# Supplementary material for: Hepatic Transcriptome Analysis Provides New Insight into the Lipid-Reducing Effect of Dietary Taurine in High–Fat Fed Groupers (Epinephelus coioides)
Source: MDPI journal article supplement (doi:10.3390/metabo12070670), 2022-07-20
Supplement: s1 [file s1]

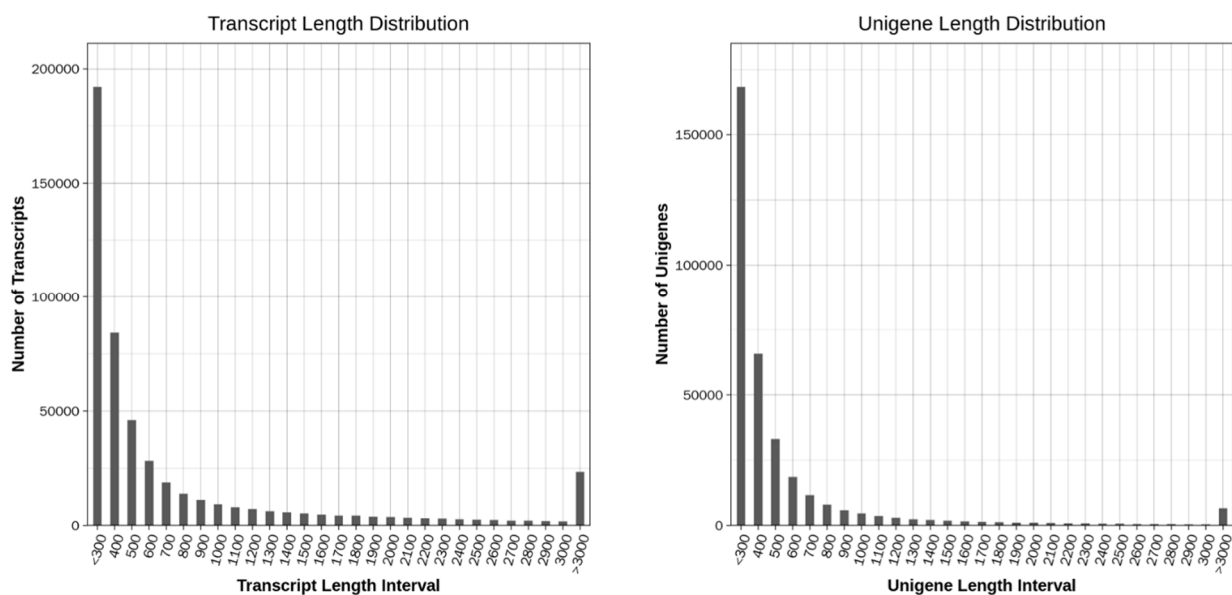

**Figure S1.** The sequence length of transcript and unigenes

The sequence length statistics of transcript and unigenes in the liver samples of *E. coioides*.

The horizontal axis represents the sequence length interval, and the vertical axis represents the number of transcripts and unigenes corresponding to the sequence length interval.

**Table S1.** Alignment statistics of the RNA-Seq analysis of the nine liver samples of *E. coioides* in Control, High-fat and Taurine groups

| Sample     | Raw reads | Clean reads | Error (%) | Q20 (%) | Q30 (%) | GC (%) |
|------------|-----------|-------------|-----------|---------|---------|--------|
| Control-1  | 40730652  | 40050010    | 0.03      | 97.79   | 93.83   | 43.39  |
| Control-2  | 42191002  | 41722212    | 0.03      | 97.82   | 93.79   | 43.99  |
| Control-3  | 40948846  | 40336514    | 0.03      | 97.8    | 93.82   | 42.16  |
| High-fat-1 | 52582890  | 52119034    | 0.02      | 98.07   | 94.3    | 45.84  |
| High-fat-2 | 52479728  | 52027176    | 0.02      | 98.46   | 95.45   | 43.35  |
| High-fat-3 | 40644396  | 40196728    | 0.02      | 98.14   | 94.53   | 47.00  |
| Taurine-1  | 46268020  | 45571324    | 0.03      | 97.56   | 93.16   | 45.94  |
| Taurine-2  | 46244384  | 45663502    | 0.03      | 97.83   | 93.69   | 46.84  |
| Taurine-3  | 41988098  | 41563038    | 0.03      | 97.94   | 94.09   | 45.03  |

Control 1-3, triplicate groups fed with control diet; High-fat 1-3, triplicate groups fed with 15% fat diet; Taurine 1-3, triplicate groups fed with 15% fat and 1% taurine. Raw reads, unfiltered Reads were off the machine; Clean reads, the total number of Clean reads.

**Table S2.** The DEGs with significantly changed KEGG pathways related to lipid metabolism in the liver of *E. coioides* in the comparison of High-fat and Taurine groups

| Gene ID       | Gene description                                          | Gene name<br>abbreviations | Pathway                                                                                                           | Log <sub>2</sub> F<br>C | RNA-seq<br>Expression<br>Pattern | qRT-PCR<br>Expression<br>Pattern |
|---------------|-----------------------------------------------------------|----------------------------|-------------------------------------------------------------------------------------------------------------------|-------------------------|----------------------------------|----------------------------------|
| TR4334_c0_g1  | ADP-ribosylation<br>factor 1/2                            | ARF1_2                     | Phospholipase D<br>signaling pathway                                                                              | -6.527                  | down                             | down                             |
| TR255_c0_g1   | pyruvate<br>dehydrogenase kinase<br>isozyme 2             | <i>PDK1</i>                | HIF-1 signaling<br>pathway                                                                                        | -2.739                  | down                             | up                               |
| TR41649_c0_g1 | glucokinase                                               | <i>GK</i>                  | Glycolysis<br>/Gluconeogenesis                                                                                    | -7.224                  | down                             | down                             |
| TR669_c0_g1   | cysteine dioxygenase                                      | <i>CDO1</i>                | Taurine and<br>hypotaurine<br>metabolism                                                                          | 2.184                   | up                               | up                               |
| TR7788_c3_g1  | sodium/potassium-<br>transporting ATPase<br>subunit alpha | <i>ATP1α</i>               | Bile secretion/<br>Insulin secretion                                                                              | 2.379                   | up                               | up                               |
| TR62_c0_g1    | calmodulin-dependen<br>t protein kinase II                | <i>CAMK</i>                | Insulin secretion                                                                                                 | 9.198                   | up                               | up                               |
| TR10507_c0_g1 | phosphatidylinositol<br>phospholipase C                   | <i>PLCD</i>                | Inositol phosphate<br>metabolism /<br>Phosphatidylinosito<br>l signaling system /<br>Calcium signaling<br>pathway | 1.978                   | up                               | down                             |
| TR4858_c0_g1  | carnitine/acylcarnitine<br>translocase                    | <i>CACT</i>                | Thermogenesis                                                                                                     | 3.156                   | up                               | up                               |

log<sub>2</sub> FC, unigenes with |log<sub>2</sub> (Fold Change) | > 1.0.

**Table S3.** Primers sequences of lipid metabolism related genes used for real-time PCR for *E. coioides*

| Target Gene     | Forward (5'-3')       | Reverse (5'-3')      | Accession number |
|-----------------|-----------------------|----------------------|------------------|
| <i>β-action</i> | TGCTGTCCCTGTATGCCTCT  | CCTTGATGTCACGCACGAT  | AY510710.2       |
| <i>ARF1_2</i>   | G TTCAGGTCTGGTCGAGGGT | TCAGGTCTCAGCAAAGTGCC | NM_201452.2      |
| <i>PDK1</i>     | AGGGCAACACAAAAAGCGGA  | GCGTGCCAACTGCCATCTAT | NM_200996.1      |
| <i>GK</i>       | GCCCTCTGTTCATCTCACGC  | TGAAGATGCCGTGTGTCAGC | NM_001045385.2   |
| <i>CDO1</i>     | GTGCCAAACAGCATCGGAGA  | AGGTTTTACACAGGAGCCGA | NM_200741.1      |
| <i>ATPase</i>   | CCAGTTACCACGACGACAGC  | GTGTCTGATGTGGGTCGCAG | NM_131686.1      |
| <i>CAMK</i>     | TGGAGTGTGTGTTTTGGGGG  | TATCGTGGAGAGGGATGCCA | GH643012.1       |
| <i>PLCD</i>     | ATCCCGTTTCTGGGGTGTCT  | AATGTGGAATGCTGGGTGCC | NM_001122773.1   |
| <i>CACT</i>     | GCAATGAGACCTTGGAGGCT  | TTGAAGTCGGTGAGAAGCCC | BC062851.1       |

Abbreviations: *ARF1\_2*, ADP-ribosylation factor 1/2; *PDK1*, pyruvate dehydrogenase kinase isozyme 2; *GK*, glucokinase; *CDO1*, cysteine dioxygenase; *ATP1α*, sodium/potassium-transporting ATPase subunit alpha; *PLCD*, phosphatidylinositol phospholipase C; *CACT*, the carnitine/acylcarnitine translocase; *CAMK*, calcium/calmodulin-dependent protein kinase (CaM kinase) II.
